# Supplementary material for: Combined deficiency of ABCA1 and ABCG1 promotes foam cell accumulation and accelerates atherosclerosis in mice
Source: JCI journal article supplement (doi:10.1172/jci33372), 2007-11-08

**Supplemental Table 1: Metabolic characteristics of *Ldlr*<sup>+/-</sup> mice transplanted with wild-type, or *Abca1*<sup>-/-</sup>, *Abcg1*<sup>-/-</sup>, *Abca1*<sup>-/-</sup>*Abcg1*<sup>-/-</sup> bone marrow before and after 12 weeks of high cholesterol diet feeding**

|                           | High cholesterol diet |                             |                             |                                                           |
|---------------------------|-----------------------|-----------------------------|-----------------------------|-----------------------------------------------------------|
|                           | <i>Wild-type</i>      | <i>Abca1</i> <sup>-/-</sup> | <i>Abcg1</i> <sup>-/-</sup> | <i>Abca1</i> <sup>-/-</sup> , <i>Abcg1</i> <sup>-/-</sup> |
|                           | n=10                  | n=10                        | n=8                         | n=9                                                       |
| <b>0 week</b>             |                       |                             |                             |                                                           |
| Body weight (g)           | 21.8 ± 0.7            | 21.0 ± 0.9                  | 20.5 ± 0.6                  | 21.1 ± 0.3                                                |
| Total cholesterol (mg/dL) | 89.2 ± 5.9            | 94.1 ± 3.2                  | 86.6 ± 4.6                  | 97.1 ± 4.9                                                |
| Triglycerides (mg/dL)     | 42.0 ± 2.8            | 44.6 ± 2.0                  | 43.0 ± 2.6                  | 44.4 ± 1.7                                                |
| <b>12 weeks</b>           |                       |                             |                             |                                                           |
| Body weight (g)           | 22.7 ± 0.7            | 22.4 ± 0.6                  | 22.5 ± 0.4                  | 23.2 ± 0.5                                                |
| Total cholesterol (mg/dL) | 240.7 ± 21.3          | 283.0 ± 12.6                | 214.9 ± 14.3                | 311.9 ± 24.2*                                             |
| Triglycerides (mg/dL)     | 24.4 ± 2.8            | 23.7 ± 2.9                  | 32.3 ± 5.0                  | 30.8 ± 2.4                                                |

\**P* < 0.05, significant difference vs. wild-type transplanted mice.

**Fig. S1: Distribution of plasma lipoprotein cholesterol and apoE as determined by FPLC analysis of plasma from *Ldlr*<sup>+/-</sup> mice transplanted with bone marrow from WT and *Abca1*<sup>-/-</sup>*Abcg1*<sup>-/-</sup> mice.** After 12 weeks on the high cholesterol diet, pooled plasma (250μL) from 6-hour fasted mice was used for fast protein liquid (FPLC) analysis using 2 Superose 6 columns in series. The buffer contains 0.1 mol/L Tris HCL and 0.4% NaN<sub>3</sub> and a flow rate of 0.7mL/min was used. A, Cholesterol content was determined enzymatically using kits from Wako. B, Equal volume of fractions 12 to 17 was used for Western blot analysis using an antibody to apoE.

Figure S1

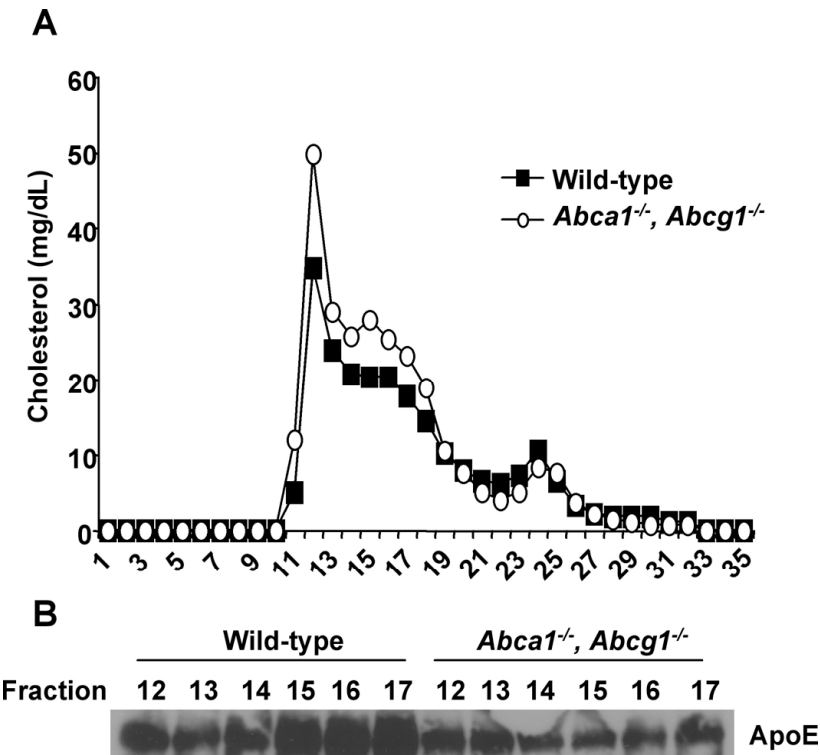

Supplement: sd1 [file 1]
